# Supplementary material
Source: Research Square preprint supplement (doi:10.21203/rs.3.rs-8914681/v1)
Supplement: Supplementary file 2 [file 2eeea9e470abcf214e669065.docx]

Supplementary material 2

**Mutation-Specific Dynamics of Dedifferentiation Trajectories and Tumor–Stromal Interactions in Thyroid Cancer**

Eun Hye Joo, Young Shin Song, Han Sai Lee, Gyeongseo Jung, Eun-Jae Chung, Su-jin Kim, Yoo Hyung Kim, Sun Wook Cho, Jae-Kyung Won, Woong-Yang Park, Young Joo Park

**Supplementary Figures 6–10**

Supplementary Figure 6

**Supplementary Fig.6: Survival analysis of epithelial cell sub types.**

Kaplan-Meier survival analysis assessing the overall survival of thyroid cancer patients based on the presence of the tumor sub-cell type signature, stratified by *BRAF*V600E- and *RAS*-driven TC groups, separately. The cut point for defining having high and low signature proportions was determined using rank statistics. The log-rank test was used to calculate the p-value and Cox proportional hazards model further confirmed the hazard ratios for both groups.

Supplementary Figure 7

**Supplementary Fig.7: Validation of tumor epithelial cell subtypes and trajectory branches using pathology and spatial transcriptomics.**

**(A)** Proportion of tumor cell type and pathology. Bar plot showing the proportion of tumor epithelial cell types across the pathology groups of patients. **(B)** Bar plot illustrating the proportion of pathology diagnoses across seven tumor epithelial cell types. **(C–E)** Validation of trajectory branches with Visium data SP-1 case. (**F–H)** Validation of trajectory branches with Visium data SP-2 case. (**I–K)** Validation of trajectory branches with Visium data SP-3 case. For each case, trajectory analysis distinguishes the ATC-specific branch and its related pathway along the trajectory.

Supplementary Figure 8

**Supplementary Fig.8: Characteristics of myoCAF and iCAF**.

**(A)** DEGs of myoCAF and iCAF identified from snRNA-seq data, and corresponding pathway enrichment analysis based on these DEGs. **(B)** Boxplot indicating CAF signature scores in fibroblast subset of snRNA-seq across four thyroid cancer groups. **(C)** CAF signature scores in a cohort of 311 pooled bulk RNA-seq samples and SMA⁺ segments of the GeoMx dataset across the same four cancer groups. **(D)** Gene Ontology enrichment analysis of the fibroblast subset from snRNA-seq across the four thyroid cancer groups.

Supplementary Figure 9

**Supplementary Fig.9: Prognostic and spatial profiling of ligand–receptor interactions in thyroid cancer**.

**(A)** Kaplan–Meier survival curves evaluating overall survival in *BRAF*V600E‑driven thyroid cancers according to the expression of selected ligand and receptor genes, with group separation based on optimal cut points; log‑rank tests and Cox proportional hazards models were used to estimate P values and hazard ratios. **(B)** Kaplan–Meier survival curves for *RAS*‑driven thyroid cancers stratified by the expression of each ligand and receptor gene within the corresponding ligand–receptor pairs, with log‑rank tests and Cox models used as in (A). **(C)** Spearman correlations between double‑positive ratios for each ligand–receptor pair and corresponding pathway scores across Visium spatial grids in two *BRAF*V600E cases (SP1 and SP2). **(D)** Same analysis as in (C), performed in one *RAS*‑driven Visium case (SP3) and one publicly available ATC Visium dataset (GSE250521_ATC2). **(E)** Ligand–receptor interaction analysis adapted from the CellPhoneDB v5 framework, applied to GeoMx DSP data using ligand–receptor pairs identified in snRNA‑seq; interaction P values were obtained from permutation‑based null distributions of mean ligand–receptor expression across interacting segments. **(F)** Spearman correlations between mean expression of ligand and receptor genes and corresponding pathway scores across GeoMx segments within *BRAF*V600E‑driven thyroid cancer cores. **(G)** Same correlation analysis as in (F), performed in *RAS*‑driven thyroid cancer cores. **(H)** Spatial visualization of selected ligand–receptor pairs in two ATC‑R Visium TMA cores, showing expression intensity and localization of ligand‑ and receptor‑positive cells.

Supplementary Figure 10

**Supplementary Fig.10: Compartment-specific IHC in thyroid tissue**. Representative immunohistochemistry images of **L1CAM**, **ITGAV**, **ITGB1**, **PLAU**, and **PLAUR** in epithelial and fibroblast regions from normal thyroid
