# Supplementary material
Source: Research Square preprint supplement (doi:10.21203/rs.3.rs-8914681/v1)
Supplement: Supplementary file 3 [file 94316e640a0d684100e76fb4.docx]

Supplementary material 1

**Mutation-Specific Dynamics of Dedifferentiation Trajectories and Tumor–Stromal Interactions in Thyroid Cancer**

Eun Hye Joo, Young Shin Song, Han Sai Lee, Gyeongseo Jung, Eun-Jae Chung, Su-jin Kim, Yoo Hyung Kim, Sun Wook Cho, Jae-Kyung Won, Woong-Yang Park, Young Joo Park

**Supplementary Figures 1–5**

Supplementary Figure 1

**Supplementary Fig. 1: Transcriptome profile using multiple datasets.**

**(A)** Heatmap displaying the Pearson correlation of each transcriptome data from four types of TC cancer, including PTC-B, ATC-B, FTC-R, and ATC-R, across multiple data platforms: snRNA-seq, WTS, and two types of spatial transcriptomics, GeoMx and Visium (SP-1, SP-2, and SP3 cases each). Each cancer group clusters together, indicating that data from different platforms share similar transcriptional characteristics within the same cancer subtype. (**B)** Transcriptomic profile of 311 publicly available WTS. (**C)** Dot plot representing global cell type markers derived from snRNA-seq data. The average expression level and percentage of cells expressing each marker across major cell types (epithelial, T/NK, myeloid, fibroblast, and endothelial) are shown. (**D)** Ro/e values for public scRNA-seq datasets (GSE193581 and GSE210347) annotated with global cell types using the “scGATE” R package. “Normal” from normal thyroid tissue, “Adj” from adjacent tissue of TCs. (**E)** GeoMx profiling of thyroid cancer subtypes. Representative histology images of each core, with regions of interest (ROIs) shown alongside immunofluorescence staining for key markers: Tumor (green), SMA+ (orange), and CD45+ (purple). The corresponding cell type proportions within each ROI, inferred using “CELLCODE,” are presented in the adjacent bar plots, categorized into epithelial, T and NK cell, myeloid, fibroblast, and endothelial populations. (**F)** Nuclei count and cell type proportion in GeoMx data. Bar plot showing the nuclei count from each segment in TC samples, divided by segment tags: tumor (KRT+), immune cells (CD45+), and stromal (SMA+). (**G)** Heatmap showing deconvoluted cell fractions across different tissue types (thyroid, neck muscle, etc.) and patient samples, identified by segment tags and cancer group. The color-coded heatmap illustrates the relative abundance of different cell types. **(H)** Spatial transcriptomes mapped to histopathological features, with regions annotated based on distinct pathological characteristics across samples SP-1 (PTC + ATC), SP-2 (PTC + ATC), and SP-3 (FTC + ATC) in the left panels. Middle panels indicate expression patterns of cell-type-specific markers (TG, PTPRC, COL1A1, and VWF) within the spatial transcriptome regions. The right panels express the mean cell type fractions for each annotated region, deconvoluted using “graphST”. (**I)** Variance components for cell type proportions across cancer groups. Immune cells and stromal cells reflected patient-specific heterogeneity rather than method-related bias. Bar plot displays the variance components of cell type proportions across different cancer groups (PTC-B, ATC-B, FTC-R, and ATC-R) for each cell type, accounting for variability among patients and four types of data sources (snRNA-seq, WTS, Visium, and GeoMx). The variance components are represented as bars, with separate bars for patient-related variance (sky) and data source-related variance (brown). Error bars represent the 95% confidence intervals for the variance estimates. A linear mixed-effects model was fitted for each cell type using the lmer() function, and variance components were extracted from the model using VarCorr(). (**J)** Mixed-effects model estimates of the impact of TDS and ERK scores on the proportions of various cell types within thyroid cancer samples, stratified by differentiation status (DTC and ATC). Error bars represent the standard deviations of random effects within each cell type.

Supplementary Figure 2

**Supplementary Fig.2: Distinct pathways activated in epithelial cells during thyroid cancer progression according to *BRAF***V600E **and *RAS* mutations.**

**(A-B)** Box plots showing gene expression heterogeneity within each cancer group, quantified using the ROGUE package. Gene entropy–based uniformity scores were calculated to assess the diversity and consistency of gene expression within each group. (A) shows results from snRNA-seq cancer groups, and (B) shows results from histologically annotated regions in Visium data. (**C)** Bar plot displaying the proportion of CNV ploidy inferred for epithelial cells across the cancer groups using the “Copycat” algorithm. **(D)** Heatmap illustrating functional characteristics across cancer groups. GSVA was used in conjunction with GO gene sets to identify key pathways activated in each group using snRNA-seq. **(E)** Heatmap illustrating functional characteristics across cancer groups in GeoMx data. Tissue type and ploidy are annotated in the upper panel, and samples are ordered by cancer group and ploidy status. **(F)** Diffusion density plots representing pathway signature scores in epithelial cells according to their CNV status. Scores for key signatures, such as TDS, BRS, ERK, and EMT, and functional pathways are compared across cancer groups and CNV status, revealing significant heterogeneity in pathway activation based on genetic alterations in snRNA-seq. **(G)** Spatial feature maps showing ploidy inferred using CNV score through "SPATA2" and functional pathway signature scores in Visium data for three thyroid cancer cases. The dotted lines indicate pathological regions based on diagnosis.

Supplementary Figure 3

**Supplementary Fig.3: Integrated transcriptomic comparison between tumor sub-cell types and normal thyroid cells, and proportional changes during dedifferentiation of tumor cells.**

**(A)** Integrated UMAP plot combining normal thyroid cells with tumor sub-cell types, using scRNA-seq data from public datasets. The seven tumor sub-cell types separated from snRNA-seq are highlighted, with their density shown to distinguish the different transcriptomic characteristics between these tumor cells and normal thyroid cells. **(B)** Heatmap of the top DEGs for each tumor sub-cell type, illustrating the distinct gene expression profiles that define each subtype, distinguished from others. **(C)** Transcriptomic profiles were assessed in seven tumor epithelial subtypes and compared across four cancer groups derived from three datasets: WTS from the public domain, Visium, and GeoMx. Correlation was calculated using Spearman's correlation (pairwise complete method). **(D)** Proportion of tumor subtypes across four datasets. For snRNA-seq, Ro/e was used; for WTS and GeoMx, "CELLCODE" deconvolution was applied; and "GraphST" was used for Visium. All deconvolution analyses used DEG references from snRNA-seq. **(E)** Log2 fold changes were calculated for ATC-B versus PTC-B for *BRAF*V600E-driven TC, and ATC-R versus FTC-R for *RAS*-driven TC, to investigate changes in cell proportions during dedifferentiation.

Supplementary Figure 4

**Supplementary Fig.4: Characteristics of epithelial cell subtypes.**

**(A)** Box plots showing the scores for TDS, BRS, ERK, EMT, and inflammation signature across the seven tumor subcell types. The bar plot next to it shows the proportion of CNV status (aneuploid vs. diploid) for each subcell type, demonstrating the distribution of genetic changes within each subtype. **(B)** Bar plots showing the count (left) and proportion (right) of thyroid tumor type predictions in the epithelial subset of snRNA-seq data using the scTypeTC package from the study by Lina Lu [PMCID: 10231997]. Predictions were generated with the scTypeTC() function based on the multinomial-lasso model. Epithelial cells were classified into four major subtypes: normal thyroid follicular cells (TFC, green), stress-responsive PTC cells (PTC1, blue), inflammatory ATC cells (ATC1, yellow), and mesenchymal ATC cells (ATC2, red). Cells with low prediction confidence are marked as undefined (grey).  **(C)** Seven tumor subtypes and their histologically annotated regions were analyzed using spatial Visium. Neighboring enrichment was calculated using a non-zero quantile threshold of 0.5 to assign cell type annotations and histological information to each barcode. **(D)** Bar plot showing the proportion of deconvoluted cell types from Visium spatial transcriptomics across different histological regions.

Supplementary Figure 5

**Supplementary Fig.5: Signature of tumor subcell type and related pathways in spatial transcriptome across histological regions.**

**(A)** Comparison between *BRAF*V600E and *RAS* in epithelial cells. Gseaplot showing RES (running enrichment score) from clusterprofiler: gseGO() in a type of tumor subcell type of *BRAF*V600E- and *RAS*-driven-TC. A positive value of NES (normalized enrichment score) indicates *RAS*-biased, and a negative value of NES indicates *BRAF*V600E-biased. Signature of tumor subcell type and related pathways in spatial transcriptome across histological regions. (B**)** Heatmap showing clustering of AUCell score of significant pathways in Fig. 2h and tumor epithelial subcell type signature in multiple regions of Visium data. The same colors are used for epithelial cell type and related pathway in the annotation.
